# Supplementary material for: Pan-genomic matching statistics for targeted nanopore sequencing
Source: PubMed Central journal article supplement (PMC8237286; doi:10.1016/j.isci.2021.102696), 2021-06-08
Supplement: mmc1.pdf [file mmc1.pdf]

**iScience, Volume 24**

**Supplemental information**

**Pan-genomic matching statistics  
for targeted nanopore sequencing**

**Omar Ahmed, Massimiliano Rossi, Sam Kovaka, Michael C. Schatz, Travis Gagie, Christina Boucher, and Ben Langmead**

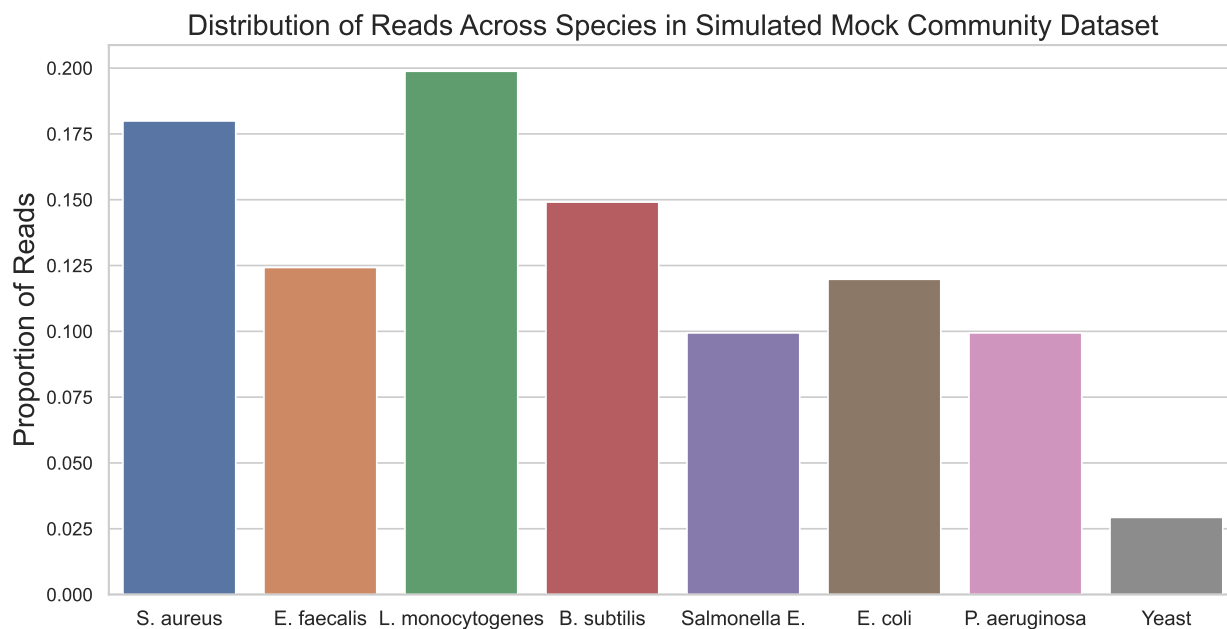

Supplementary Figure 1: Proportion of reads from each species in mock community in the simulated mock community dataset which is related to Section 2.3.2.

| <b>Number of Genomes Included in Each Mock Community Index</b> |                        |                        |  |
|----------------------------------------------------------------|------------------------|------------------------|--|
| <b>Species \ Reference:</b>                                    | <b>One Genome Ref.</b> | <b>Pan-genome Ref.</b> |  |
| Staphylococcus aureus                                          | 1                      | 574                    |  |
| Enterococcus faecalis                                          | 1                      | 49                     |  |
| Listeria monocytogenes                                         | 1                      | 225                    |  |
| Bacillus subtilis                                              | 1                      | 165                    |  |
| Salmonella enterica                                            | 1                      | 880                    |  |
| Escherichia coli                                               | 1                      | 1370                   |  |
| Pseudomonas aeruginosa                                         | 1                      | 274                    |  |
| Saccharomyces cerevisiae                                       | 1                      | 1                      |  |

Table S1: Number of genomes for each species in the different references used for the mock community experiment which is related to Section 2.3.2.

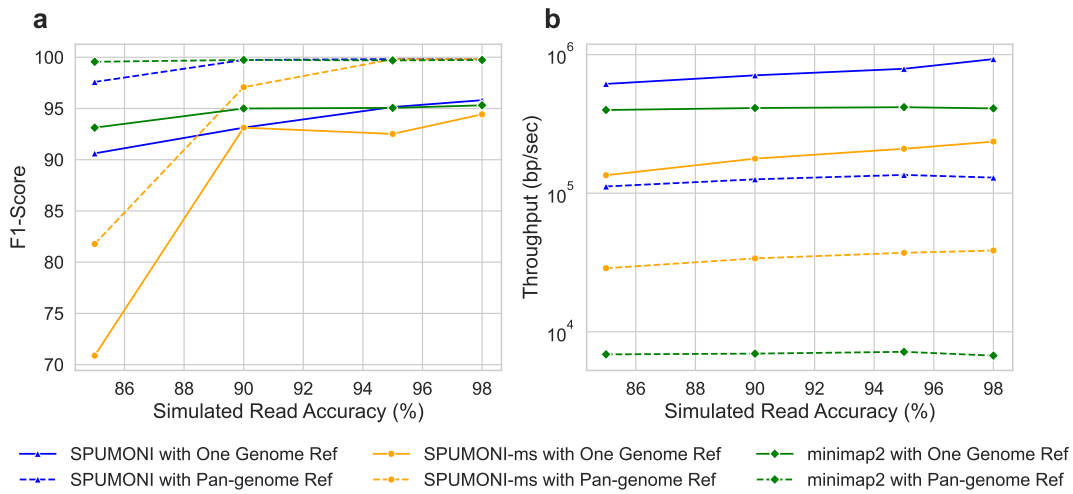

Supplementary Figure 2: Visualization of (a)  $F_1$ -score, (b) throughput with varying simulated base-call accuracies which is related to Table 2.

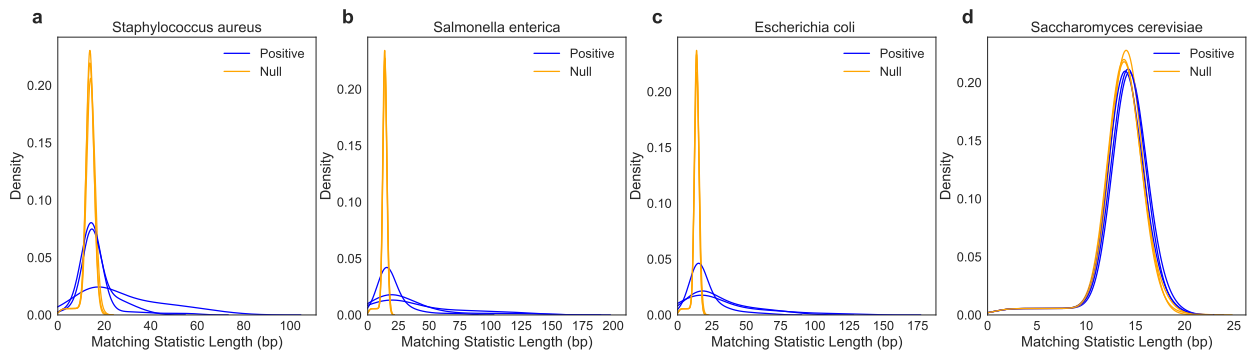

Supplementary Figure 3: Distribution of matching statistics against positive and null indexes for three randomly chosen reads of (a) *Staphylococcus aureus*, (b) *Salmonella enterica*, (c) *Escherichia coli*, and (d) *Saccharomyces cerevisiae*. Each density curve is based on the first 720 bases ( $\sim 1.6$  seconds) of ReadUntil data for each read, which is related to Section 2.3.3.

KS-stat Between Positive and Null Matching Statistic Distributions of Reads from Different Species

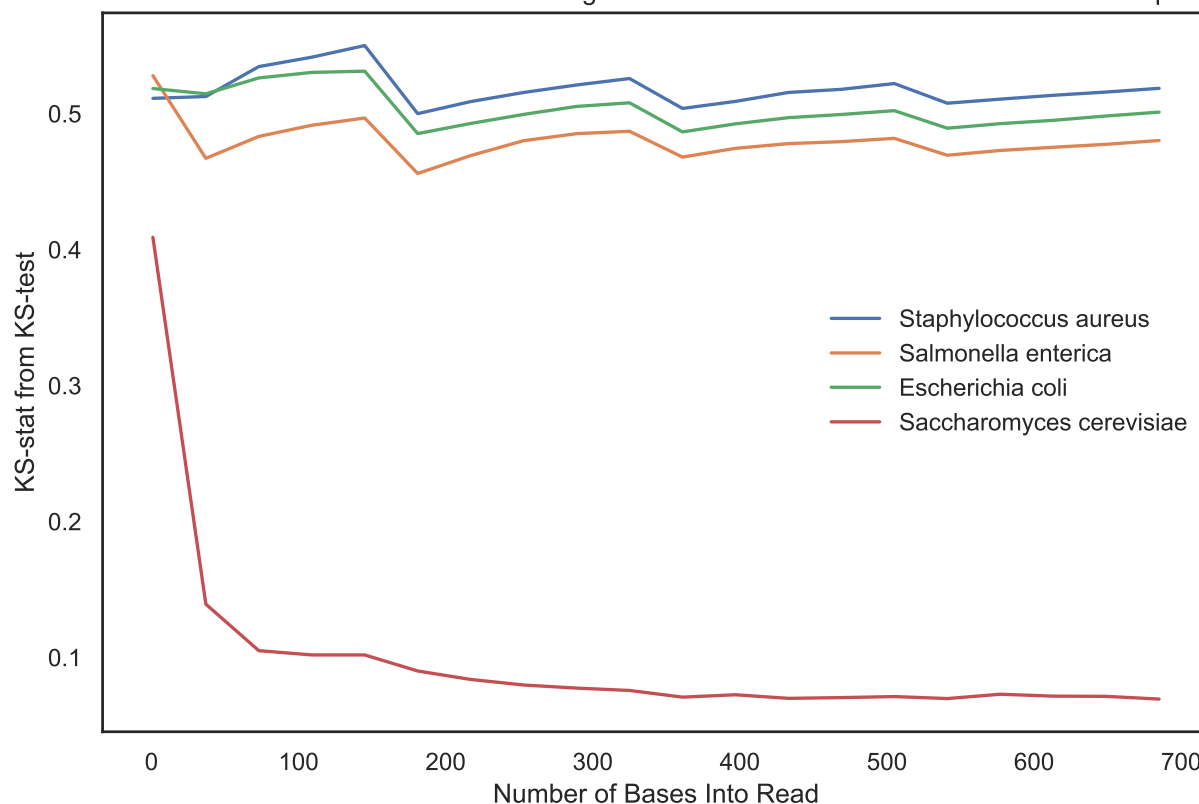

Supplementary Figure 4: Each line represents the average of the Kolmogorov-Smirnov statistic (KS-stat) across all reads from that respective species in the mock community. The figure (related to Section 2.3.3) shows that for bacterial species (*Staphylococcus aureus*, *Salmonella enterica*, and *Escherichia coli*) the KS-stat is relatively larger at  $\sim 0.5$  since the reads are matching to sequence in the positive index. While for the yeast reads, the KS-stat is small at  $\sim 0.1$  since the distribution of positive and null matching statistics are quite similar to each other.

---

**Algorithm 1** Matching Statistics

---

```
given text  $T$  and a pattern  $p$ 
//first pass: get pointers
1:  $j \leftarrow 1, pos \leftarrow SA[j]$ 
2: for  $i \leftarrow p.len$  to 1 do
3:   if  $p[i] \neq BWT[j]$  then
4:     if  $j < Thr(j, p[i])$  then
5:        $j \leftarrow BWT.pred(j, p[i])$ 
6:     else
7:        $j \leftarrow BWT.succ(j, p[i])$ 
8:      $pos \leftarrow SA[j] - 1$ 
9:   else
10:     $pos \leftarrow pos - 1$ 
11:     $pointers[i] \leftarrow pos$ 
12:     $j \leftarrow LF(j)$ 
//second pass: get lengths
13:  $\ell \leftarrow 0$ 
14: for  $i \leftarrow 1$  to  $pointers.len$  do
15:    $pos \leftarrow pointers[i] + \ell, j \leftarrow i + \ell$ 
16:   while  $j < p.len$  and  $p[j] = T[pos]$  do
17:      $\ell \leftarrow \ell + 1$ 
18:      $pos \leftarrow pos + 1, j \leftarrow j + 1$ 
19:    $ms[i] \leftarrow \ell$ 
20:    $\ell \leftarrow \max(\ell - 1, 0)$ 
21: Return  $ms$ 
```

---

---

**Algorithm 2** Pseudo Matching Lengths

---

```
given text  $T$  and a pattern  $p$ 
//first pass: get pointers and pmls
1:  $j \leftarrow 1, \ell \leftarrow 0$ 
2: for  $i \leftarrow p.len$  to 1 do
3:   if  $p[i] \neq BWT[j]$  then
4:     if  $j < Thr(j, p[i])$  then
5:        $j \leftarrow BWT.pred(j, p[i])$ 
6:     else
7:        $j \leftarrow BWT.succ(j, p[i])$ 
8:      $\ell \leftarrow 0$ 
9:   else
10:     $\ell \leftarrow \ell + 1$ 
11:     $pml[i] \leftarrow \ell$ 
12:     $j \leftarrow LF(j)$ 
13: Return  $pml$ 
```

---

Supplementary Figure 5: Matching statistics (Algorithm 1) and Pseudo Matching Lengths (Algorithm 2) computation using the thresholds (which is related to Section 11.2.2). Given an array  $a$ ,  $a.len$  refers to the length of the array. Given a position  $j$  in the BWT,  $LF(j)$  is the LF-mapping,  $SA$  is the suffix array sampled at run boundaries,  $BWT.pred(j, c)$  is the position in the BWT of the first character  $c$  preceding position  $j$ ,  $BWT.succ(j, c)$  is the position in the BWT of the first character  $c$  following position  $j$ ,  $Thr(j, c)$  is the position of the threshold for the character  $c$  between the run of  $c$  preceding and following position  $j$  in the BWT. To avoid overloading the notation, we consider the variable  $pos$  to be  $(pos \bmod T.len) + 1$ . Furthermore, note that if  $BWT.pred(j, c)$ , the threshold value is guaranteed to be smaller than or equals to  $j$ , i.e.,  $Thr(j, c) = 0$ . Similarly, if  $BWT.succ(j, c)$ , the threshold value is guaranteed to be greater than  $j$ , i.e.,  $Thr(j, c) = T.len + 1$ .
